# Supplementary material for: Waiting-Time Distribution for Korean Stock-Market Index KOSPI
Source: Royal Society of Chemistry journal article supplement (doi:10.1039/c7an01748k), 2006-01-01
Supplement: c7an01748k1.pdf [file c7an01748k1.pdf]

*Electronic Supplementary Information (ESI)*

**Performance of Point-of-Care Diagnosis of AIDS:  
Label-Free One-Step-Immunoassay vs. Lateral Flow Assay**

Jung-Hyuk Kwon,<sup>a,¶</sup> Hee-Tae Kim,<sup>a,¶</sup> Sang Jun Sim,<sup>a</sup> Young Joo Cha,<sup>b</sup> and Jeewon Lee<sup>a,\*</sup>

<sup>¶</sup>These authors contributed equally to this work.

**\*Corresponding author:**

(Phone) +82-2-3290-3304; (Fax) +82-2-926-6102; (E-mail) [leejw@korea.ac.kr](mailto:leejw@korea.ac.kr)

<sup>a</sup>Department of Chemical and Biological Engineering, College of Engineering, Korea University, Anam-Ro 145, Seoul 136-713, Republic of Korea, <sup>b</sup>College of Medicine, Chung-Ang University, Heuksuk-Ro 84, Seoul 156-756, Republic of Korea.

| Concentration of anti-gp41 IgG standard (µg/mL)                                   |     |                                                                                   |     |                                                                                   |     |                                                                                   |     |                                                                                     |     |                                                                                     |     |
|-----------------------------------------------------------------------------------|-----|-----------------------------------------------------------------------------------|-----|-----------------------------------------------------------------------------------|-----|-----------------------------------------------------------------------------------|-----|-------------------------------------------------------------------------------------|-----|-------------------------------------------------------------------------------------|-----|
| 0                                                                                 |     | 20                                                                                |     | 50                                                                                |     | 100                                                                               |     | 200                                                                                 |     | 500                                                                                 |     |
| Strip                                                                             | RPI | Strip                                                                             | RPI | Strip                                                                             | RPI | Strip                                                                             | RPI | Strip                                                                               | RPI | Strip                                                                               | RPI |
|  | 1.0 |  | 1.0 |  | 1.0 |  | 1.0 |  | 1.0 |  | 1.0 |
| Control                                                                           |     |                                                                                   |     |                                                                                   |     |                                                                                   |     |                                                                                     |     |                                                                                     |     |
| AIDS                                                                              |     |  |     |  |     |  |     |  |     |  |     |
|                                                                                   |     | $0 \pm 0$<br>(Avg $\pm$ S.D)                                                      |     | $0.06 \pm 0.01$                                                                   |     | $0.08 \pm 0.01$                                                                   |     | $0.06 \pm 0.01$                                                                     |     | $0.15 \pm 0.02$                                                                     |     |

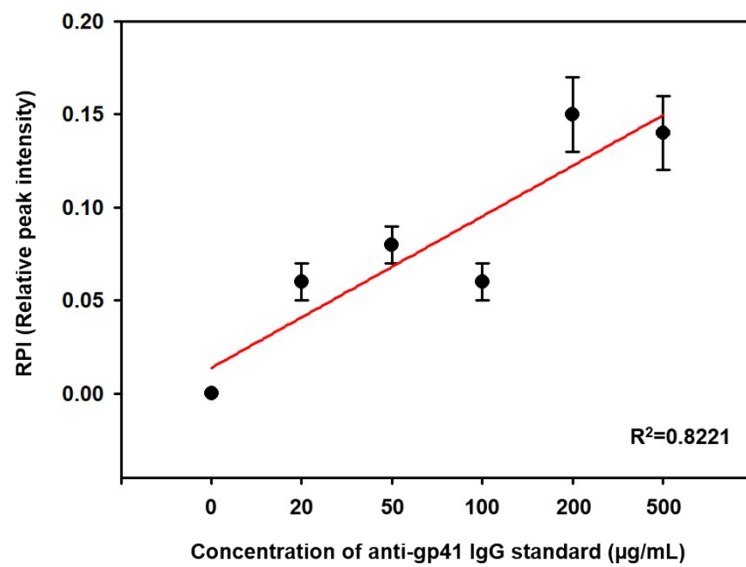

**Fig. S11** Numerical relationships between test line intensity (RPI) and concentration of standard target (anti-gp41 IgG) in LFA.

| Concentration of anti-gp41 IgG standard (ng/mL)                                   |                            |                                                                                   |                        |                                                                                   |                        |                                                                                   |                        |                                                                                    |                        |                                                                                     |                        |
|-----------------------------------------------------------------------------------|----------------------------|-----------------------------------------------------------------------------------|------------------------|-----------------------------------------------------------------------------------|------------------------|-----------------------------------------------------------------------------------|------------------------|------------------------------------------------------------------------------------|------------------------|-------------------------------------------------------------------------------------|------------------------|
| 0                                                                                 |                            | 0.001                                                                             |                        | 0.01                                                                              |                        | 0.1                                                                               |                        | 1                                                                                  |                        | 10                                                                                  |                        |
| Well                                                                              | O.D. <sub>.555nm</sub>     | Well                                                                              | O.D. <sub>.555nm</sub> | Well                                                                              | O.D. <sub>.555nm</sub> | Well                                                                              | O.D. <sub>.555nm</sub> | Well                                                                               | O.D. <sub>.555nm</sub> | Well                                                                                | O.D. <sub>.555nm</sub> |
|  | 0.44 ± 0.06<br>(Avg ± S.D) |  | 0.53 ± 0.08            |  | 0.60 ± 0.05            |  | 0.71 ± 0.06            |  | 1.02 ± 0.12            |  | 1.19 ± 0.07            |

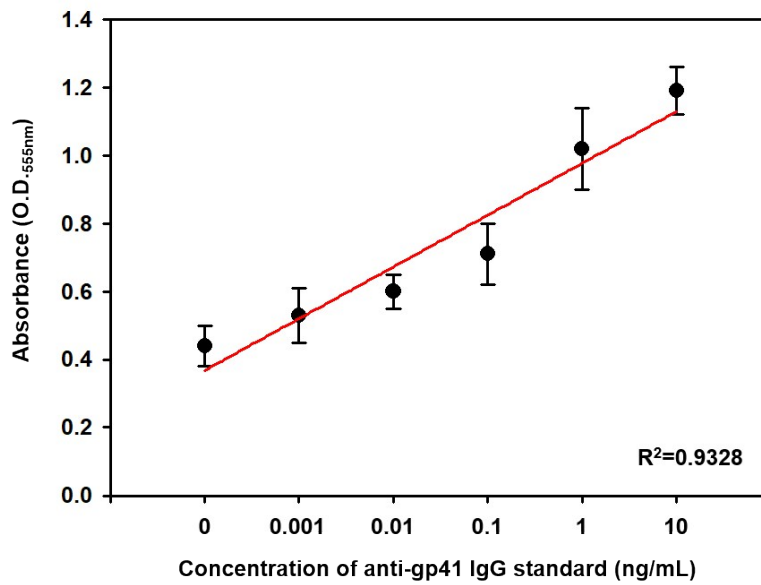

**Fig. SI2** Numerical relationships between O.D.<sub>.555nm</sub> (measured at 25 min after assay begins) and concentration of standard target (anti-gp41 IgG) in one-step-immunoassay.

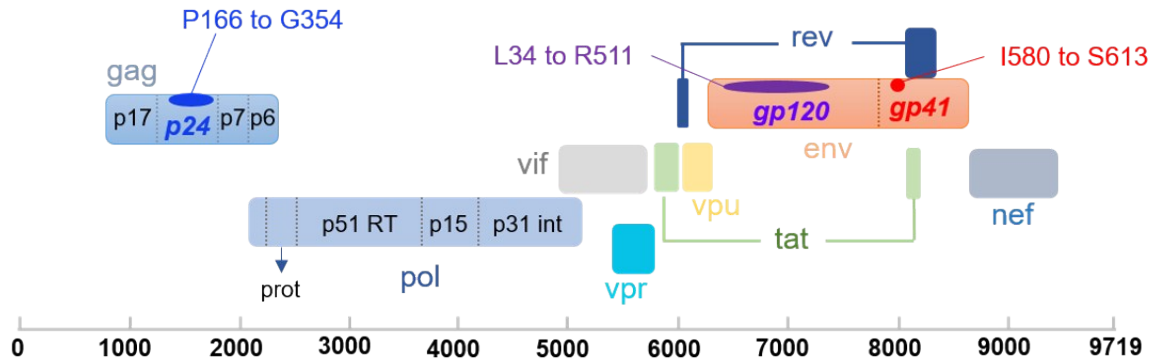

### HIV gag protein

MGARASVLSG GELDRWEKIR LRPGGKKKYK LKHIVWASRE LERFAVNPGL LETSEGCRQI LGQLQPSLQT  
 GSEELRSLYN TVATLYCVHQ RIEIKDTKEA 100 LDKIEEEQNK SKKKAQAAAA DTGHSNQVSQ NYPVQNIQ  
 QMVHQAIQPR TLNAWVKVVE EKAFS **P166 EVIPMFSA** **SEGAT PQDLNTMLNT VGGHQAAMQM LKETINEEAA**  
**EWDRVHPVHA GPIAPQMRE PRGSDIAGTT STLQEQIGWM TNNPPIPVGE IYKRWIILGL NKIVRMYSP**  
**SILDIRQGP EPFRDYVDRF YKTLRAEQAS QEVKNWMTET LLVQANPDC KTILKALGPA ATLEEMMTACQGV**  
**G354** GPGHKA RVLAEAMSQV TNSATIMMQR GNFRNQKIV KCFNCGKEGH 400 TARNCRAPRK KGCWKCGKEG  
 HQMKDCTERQ ANFLGKIWPS YKGRPGNFLQ SRPEPTAPPE ESFRSGVETT TPPQKQEPID KELYPLTSLR  
 SLFGNDPSSQ 500

### HIV envelope glycoprotein [gp160 (gp120+gp41)]

MRVKEKYQHL WRWGWRWGTG LLGM **L34 MICA** **TEKLWVTVYY GVPVWKEATT TLFCASDAKA**  
**YDTEVHNWVA THACVPTDPN PQEVVLNVNT ENFMWKNM VEQMHEDIIS LWDQSLKPCV KLTPLCVSLK**  
**CTDLKNDTNT NSSSGRMIME KGEIKNCSFN ISTSIRGKVQ KEYAFFYKLD IIPIDNTTS YKLTSCNTSV**  
**ITQACPKVSF EPIPIHYCAP AGFAILKCNN KTFNGTGPC T NVSTVQCTHG IRPVVSTQLL LNGSLAEEVV**  
**VIRSVNFTDN AKTIIVQLNT SVEINCTRPN NNTRKRIRIQ RGPGRAFTI GKIGNMRQAH CNISRAKWN**  
**TLKQIASKLR EQFGNNKTII FKQSSGGDPE IVTHSFNCGG EFFYCNSTQL FNSTWFNSTW STEGSNNTEG**  
**SDTITLPCR KQIINMWQKV GKAMYAPPIS GQIRCSSNIT GLLLTRDGGN SNESEIFRP GGGDMRDNWR**  
**SELYKYKVVK IEPLGVAPTK AKRRVVQREK R511** AVGIGALFL GFLGAAGSTM GAASMTLTVQ ARQLLSGIVQ  
 QQNNLLRAIE AQHLLQLTV WGIKQLQAR **I580 LAVERYLKDQQLGIWGCSGKLICTTAVP** **WNA S613** WSNKSLE  
 QIWNHTTWME WDREINNYTS LIHSLIEESQ NQEQKNEQEL LECDKWASLW NWFNITNWLW YIKLFIMIVG  
 GLVGLRIVFA 700 VLSIVNRVRQ GYSPLSFQTH LPTPRGPDRP EGIEEEGGER DRDRSIRLVN GSLALIWDDL  
 RSLCLFSYHR LRDLLIVTR IVELLGRRGW EALKYWWNLL 800 QYWSQELKNS AVSLLNATAI AVAEGTDRVI  
 EVVQGACRAI RHIPRRIRQG LERILL

**Fig. SI3** Sequences of antigenic epitopes (envelope glycoproteins, gp41 and gp120 and gag protein, p24) of HIV that are used to capture anti-HIV antibodies in patient sera.

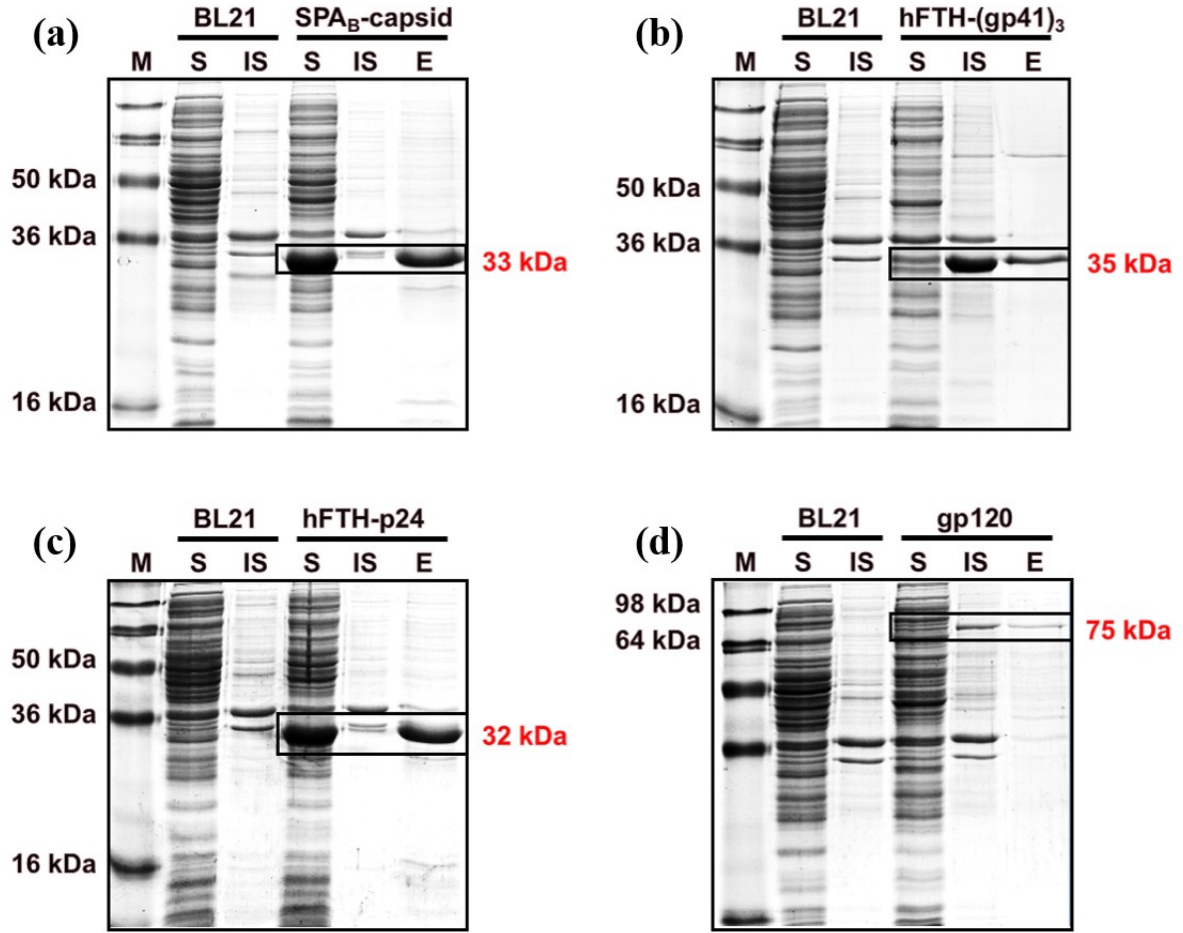

**Fig. S14.** Results of SDS-PAGE analyses of three types of probes to capture anti-HIV antibodies. (a) H<sub>6</sub>-SPA<sub>B</sub>-capsid, (b) hFTH-(gp41)<sub>3</sub>-H<sub>6</sub>, (c) hFTH-p24-H<sub>6</sub>, and (d) N-ePGK-gp120. (M: Seeblue protein marker, S and IS: soluble and insoluble fraction of recombinant *E. coli* lysates, E: purified and eluted protein fraction. BL21: wild-type *E. coli* (control).

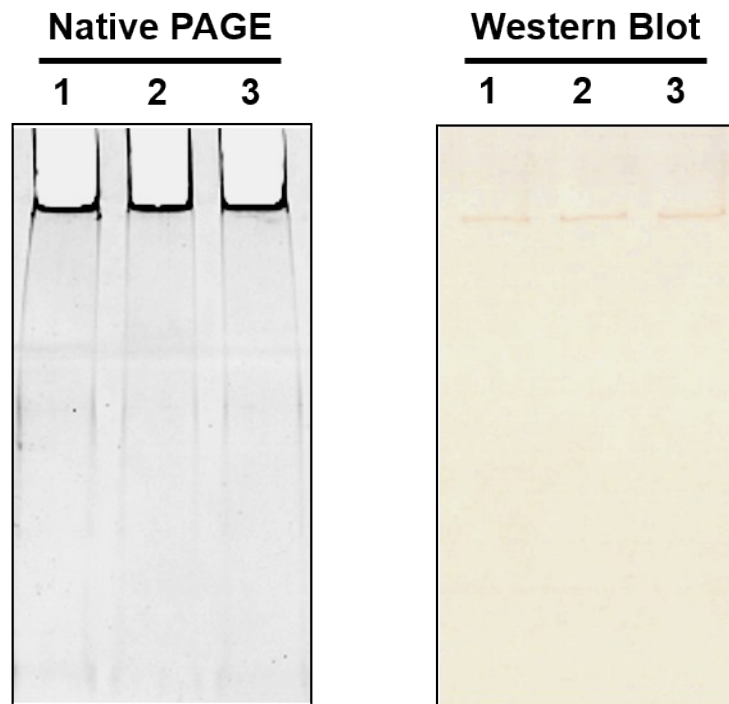

**Fig. SI5** Results of native PAGE and Western blot analyses of 1) H<sub>6</sub>-SPA<sub>B</sub>-capsid, 2) hFTH-(gp41)<sub>3</sub>-H<sub>6</sub>, and 3) hFTH-p24-H<sub>6</sub>, respectively. For Western blot, anti-His tag (H<sub>6</sub>) antibody was used as primary antibody.

| N1                                                                                  |                                                                                     |            | N2                                                                                  |                                                                                     |            | N3                                                                                  |                                                                                     |            | N4                                                                                  |                                                                                       |            | N5                                                                                    |                                                                                       |            |
|-------------------------------------------------------------------------------------|-------------------------------------------------------------------------------------|------------|-------------------------------------------------------------------------------------|-------------------------------------------------------------------------------------|------------|-------------------------------------------------------------------------------------|-------------------------------------------------------------------------------------|------------|-------------------------------------------------------------------------------------|---------------------------------------------------------------------------------------|------------|---------------------------------------------------------------------------------------|---------------------------------------------------------------------------------------|------------|
| Strip                                                                               | Peak intensity                                                                      | RPI        | Strip                                                                               | Peak intensity                                                                      | RPI        | Strip                                                                               | Peak intensity                                                                      | RPI        | Strip                                                                               | Peak intensity                                                                        | RPI        | Strip                                                                                 | Peak intensity                                                                        | RPI        |
|    |    | 1.0<br>0.0 |    |    | 1.0<br>0.0 |    |    | 1.0<br>0.0 |    |    | 1.0<br>0.0 |    |    | 1.0<br>0.0 |
| N6                                                                                  |                                                                                     |            | N7                                                                                  |                                                                                     |            | N8                                                                                  |                                                                                     |            | N9                                                                                  |                                                                                       |            | N10                                                                                   |                                                                                       |            |
| Strip                                                                               | Peak intensity                                                                      | RPI        | Strip                                                                               | Peak intensity                                                                      | RPI        | Strip                                                                               | Peak intensity                                                                      | RPI        | Strip                                                                               | Peak intensity                                                                        | RPI        | Strip                                                                                 | Peak intensity                                                                        | RPI        |
|    |    | 1.0<br>0.0 |    |    | 1.0<br>0.0 |    |    | 1.0<br>0.0 |    |    | 1.0<br>0.0 |    |    | 1.0<br>0.0 |
| N11                                                                                 |                                                                                     |            | N12                                                                                 |                                                                                     |            | N13                                                                                 |                                                                                     |            | N14                                                                                 |                                                                                       |            | N15                                                                                   |                                                                                       |            |
| Strip                                                                               | Peak intensity                                                                      | RPI        | Strip                                                                               | Peak intensity                                                                      | RPI        | Strip                                                                               | Peak intensity                                                                      | RPI        | Strip                                                                               | Peak intensity                                                                        | RPI        | Strip                                                                                 | Peak intensity                                                                        | RPI        |
|   |   | 1.0<br>0.0 |   |   | 1.0<br>0.0 |   |   | 1.0<br>0.0 |   |   | 1.0<br>0.0 |   |   | 1.0<br>0.0 |
| N16                                                                                 |                                                                                     |            | N17                                                                                 |                                                                                     |            | N18                                                                                 |                                                                                     |            | N19                                                                                 |                                                                                       |            | N20                                                                                   |                                                                                       |            |
| Strip                                                                               | Peak intensity                                                                      | RPI        | Strip                                                                               | Peak intensity                                                                      | RPI        | Strip                                                                               | Peak intensity                                                                      | RPI        | Strip                                                                               | Peak intensity                                                                        | RPI        | Strip                                                                                 | Peak intensity                                                                        | RPI        |
|  |  | 1.0<br>0.0 |  |  | 1.0<br>0.0 |  |  | 1.0<br>0.0 |  |  | 1.0<br>0.0 |  |  | 1.0<br>0.0 |

**Fig. SI6** Test results of 20 healthy controls in the type-2 LFA assay (LFA2 using three different probes, hFTH-(gp41)<sub>3</sub>-H<sub>6</sub>, hFTH-p24-H<sub>6</sub>, and N-ePGK-gp120). (RPI represents relative peak intensity, i.e. intensity ratio of test to control line.)

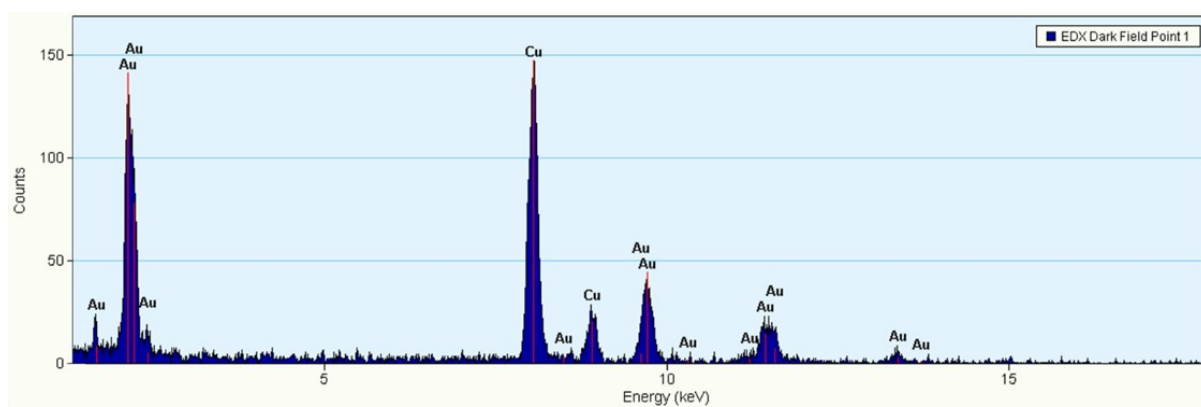

**Fig. SI7** EDX spectroscopy analyses of assay solution of AIDS patient sera.

**Table SI1.** Recently reported assay performance of LFA-based diagnoses of AIDS

| Method                                        | Sensitivity /<br>Specificity | Sample type | Ref.                      |
|-----------------------------------------------|------------------------------|-------------|---------------------------|
| The Aware HIV-1/2 U (LFA)                     | 97.2%<br>/ 100%              | Urine       | Supplementary<br>Ref. 1   |
| Determine™ HIV-1/2 Ag/Ab<br>Combo assay (LFA) | 50, 86%<br>/ 62%             | Serum       | Supplementary<br>Ref. 2,3 |
| Lateral flow p24 assay (LFA)                  | 95%<br>/ 99%                 | Plasma      | Supplementary<br>Ref. 4   |

### Supplementary References

- 1 M. K. H. G. Setty and I. K. Hewlett, *AIDS Res. Treat.*, 2014, **2014**, 1-20.
- 2 J. Fox, H. Dunn, S. O'Shea, *Sex. Transm. Infect.*, 2011, **87**, 178-179.
- 3 G. Beelaert, K. Fransen, *J. Virol. Methods*, 2010, **168(1-2)**, 218-222
- 4 Z. A. Parpia, R. Elghanian, A. Nabatiyan, D. R. Hardie, D. M. Kelso, *J. Acquir. Immune. Defic. Syndr.*, 2010, **55**, 413-419
